# Supplementary material for: The Relationships between Parenting Practices and Child Health-Related Behaviors in Children with Intellectual Disability: The Moderating Role of Child Body Weight Status
Source: MDPI journal article supplement (doi:10.3390/nu14245206), 2022-12-07
Supplement: s1 [file s1]

**Table S1 Items and subscales of the scale of parenting practices \***

| Item                                                                                                       | Rating                                       |
|------------------------------------------------------------------------------------------------------------|----------------------------------------------|
| <b>Diet and PA monitoring (MO, 6 items)</b>                                                                |                                              |
| How much do you keep track of sweet snacks (such as cake, candy, ice cream, etc.) that your child eats?    | From 1=never to 5=always                     |
| How much do you keep track of high-fat foods (such as fried food, puffed food, etc.) that your child eats? | From 1=never to 5=always                     |
| How much do you keep track of servings of fruit & vegetable that your child eats?                          | From 1=never to 5=always                     |
| My child has to get my permission before eating snacks.                                                    | From 1=never to 5=always                     |
| How much do you keep track of the amount of TV or videos your child is watching?                           | From 1=never to 5=always                     |
| How much do you keep track of the intensity and duration of PA of your child?                              | From 1=never to 5=always                     |
| <b>Restricting access to unhealthy food and sedentary behaviours (RA, 4 items)</b>                         |                                              |
| I limit the amount of sweetened drinks (e.g. coke, sprite, orange juice) my child drinks.                  | From 1=never to 5=always                     |
| I limit the number of snacks my child eats.                                                                | From 1=never to 5=always                     |
| On weekdays, I limit the amount of TV or videos my child is watching.                                      | From 1=never to 5=always                     |
| On weekends, I limit the amount of TV or videos my child is watching.                                      | From 1=never to 5=always                     |
| <b>Pressure to eat more (PE, 3 items)</b>                                                                  |                                              |
| I have to be especially careful to make sure my child eats enough.                                         | From 1=strongly disagree to 5=strongly agree |
| I let my child eat more even if he/she says “I am full”.                                                   | From 1=strongly disagree to 5=strongly agree |
| My child eats less than what he/she should eat if I do not intervene.                                      | From 1=strongly disagree to 5=strongly agree |
| <b>Reinforcement regarding children’s eating and PA (RF, 2 items)</b>                                      |                                              |
| I praise my child if he/she eats healthy food.                                                             | From 1=strongly disagree to 5=strongly agree |
| I praise my child if he/she actively increases PA.                                                         | From 1=strongly disagree to 5=strongly agree |
| <b>Using food or sedentary behaviours as rewards (UR, 2 items)</b>                                         |                                              |
| I would offer some snacks (such as candy, ice cream, etc.) as a reward for good behaviours.                | From 1=strongly disagree to 5=strongly agree |
| I would offer TV, video, or video games to my child as a reward for good behaviours.                       | From 1=strongly disagree to 5=strongly agree |

\*: the scale was developed by Wen & Hui, 2012 for Chinese children and possesses sound validity and reliability.

Abbreviations: PA, physical activity.

## 父母教養行為問卷

請選擇與您想法和行為一致的表述，選項從左至右的行為頻率或同意程度依次增高，請選出最符合您情況的答案。

| 下述題目詢問您行為發生的頻率                  | 從不 | 很少 | 有時 | 經常 | 總是 |
|---------------------------------|----|----|----|----|----|
| 1. 我會關注我的孩子吃甜食的數量（如蛋糕、糖果、霜淇淋）   | ①  | ②  | ③  | ④  | ⑤  |
| 2. 我會關注我的孩子吃高油脂食品的數量（如：油炸、膨化食品） | ①  | ②  | ③  | ④  | ⑤  |
| 3. 我會關注我的孩子吃蔬菜水果的數量             | ①  | ②  | ③  | ④  | ⑤  |
| 4. 我的孩子吃零食之前要經過我同意              | ①  | ②  | ③  | ④  | ⑤  |

|                                |   |   |   |   |   |
|--------------------------------|---|---|---|---|---|
| 5. 我會關注我的孩子看電視、玩電子遊戲、和上網的時間    | ① | ② | ③ | ④ | ⑤ |
| 6. 我會關注我的孩子體育鍛煉的運動強度和時間        | ① | ② | ③ | ④ | ⑤ |
| 7. 我會控制我的孩子喝含糖飲料的量（可樂、雪碧、鮮橙多等） | ① | ② | ③ | ④ | ⑤ |
| 8. 我會控制我的孩子吃零食的數量              | ① | ② | ③ | ④ | ⑤ |
| 9. 週一到週五，我會控制我的孩子看電視、玩電子遊戲的時間。 | ① | ② | ③ | ④ | ⑤ |
| 10. 週末，我會控制我的孩子看電視、玩電子遊戲的時間。   | ① | ② | ③ | ④ | ⑤ |

| 下述題目詢問您對於事情的看法                   | 完全不同意 | 不同意 | 中立 | 同意 | 完全同意 |
|----------------------------------|-------|-----|----|----|------|
| 11. 我應該特別關注，確保讓我的孩子吃飽飯           | ①     | ②   | ③  | ④  | ⑤    |
| 12. 假如我的孩子說「我吃飽了」，我還是會儘量讓他/她再吃一些 | ①     | ②   | ③  | ④  | ⑤    |
| 13. 假如我不對孩子的飲食加以指導和調節，他會吃得比他該吃的少 | ①     | ②   | ③  | ④  | ⑤    |
| 14. 假如我的孩子選擇吃健康的食品，我會表揚他/她       | ①     | ②   | ③  | ④  | ⑤    |
| 15. 假如我的孩子積極參加體育運動，我會表揚他/她       | ①     | ②   | ③  | ④  | ⑤    |
| 16. 假如孩子表現好，我會給些零食（糖果、冰淇淋等）獎勵他/她 | ①     | ②   | ③  | ④  | ⑤    |
| 17. 假如孩子表現好，我會讓他/她看電視或者玩電子遊戲作為獎勵 | ①     | ②   | ③  | ④  | ⑤    |
